# Supplementary material
Source: MDPI journal article supplement (https://www.mdpi.com/2072-4292/11/19/2269)
Supplement: s1 [file s1]

Supplementary Material

# **Long-Term Spatial and Temporal Monitoring of Cyanobacteria Blooms Using MODIS on Google Earth Engine: A Case Study in Taihu Lake**

Tianxia Jia <sup>1,2</sup>, Xueqi Zhang <sup>1,2</sup> and Rencai Dong <sup>1,\*</sup>

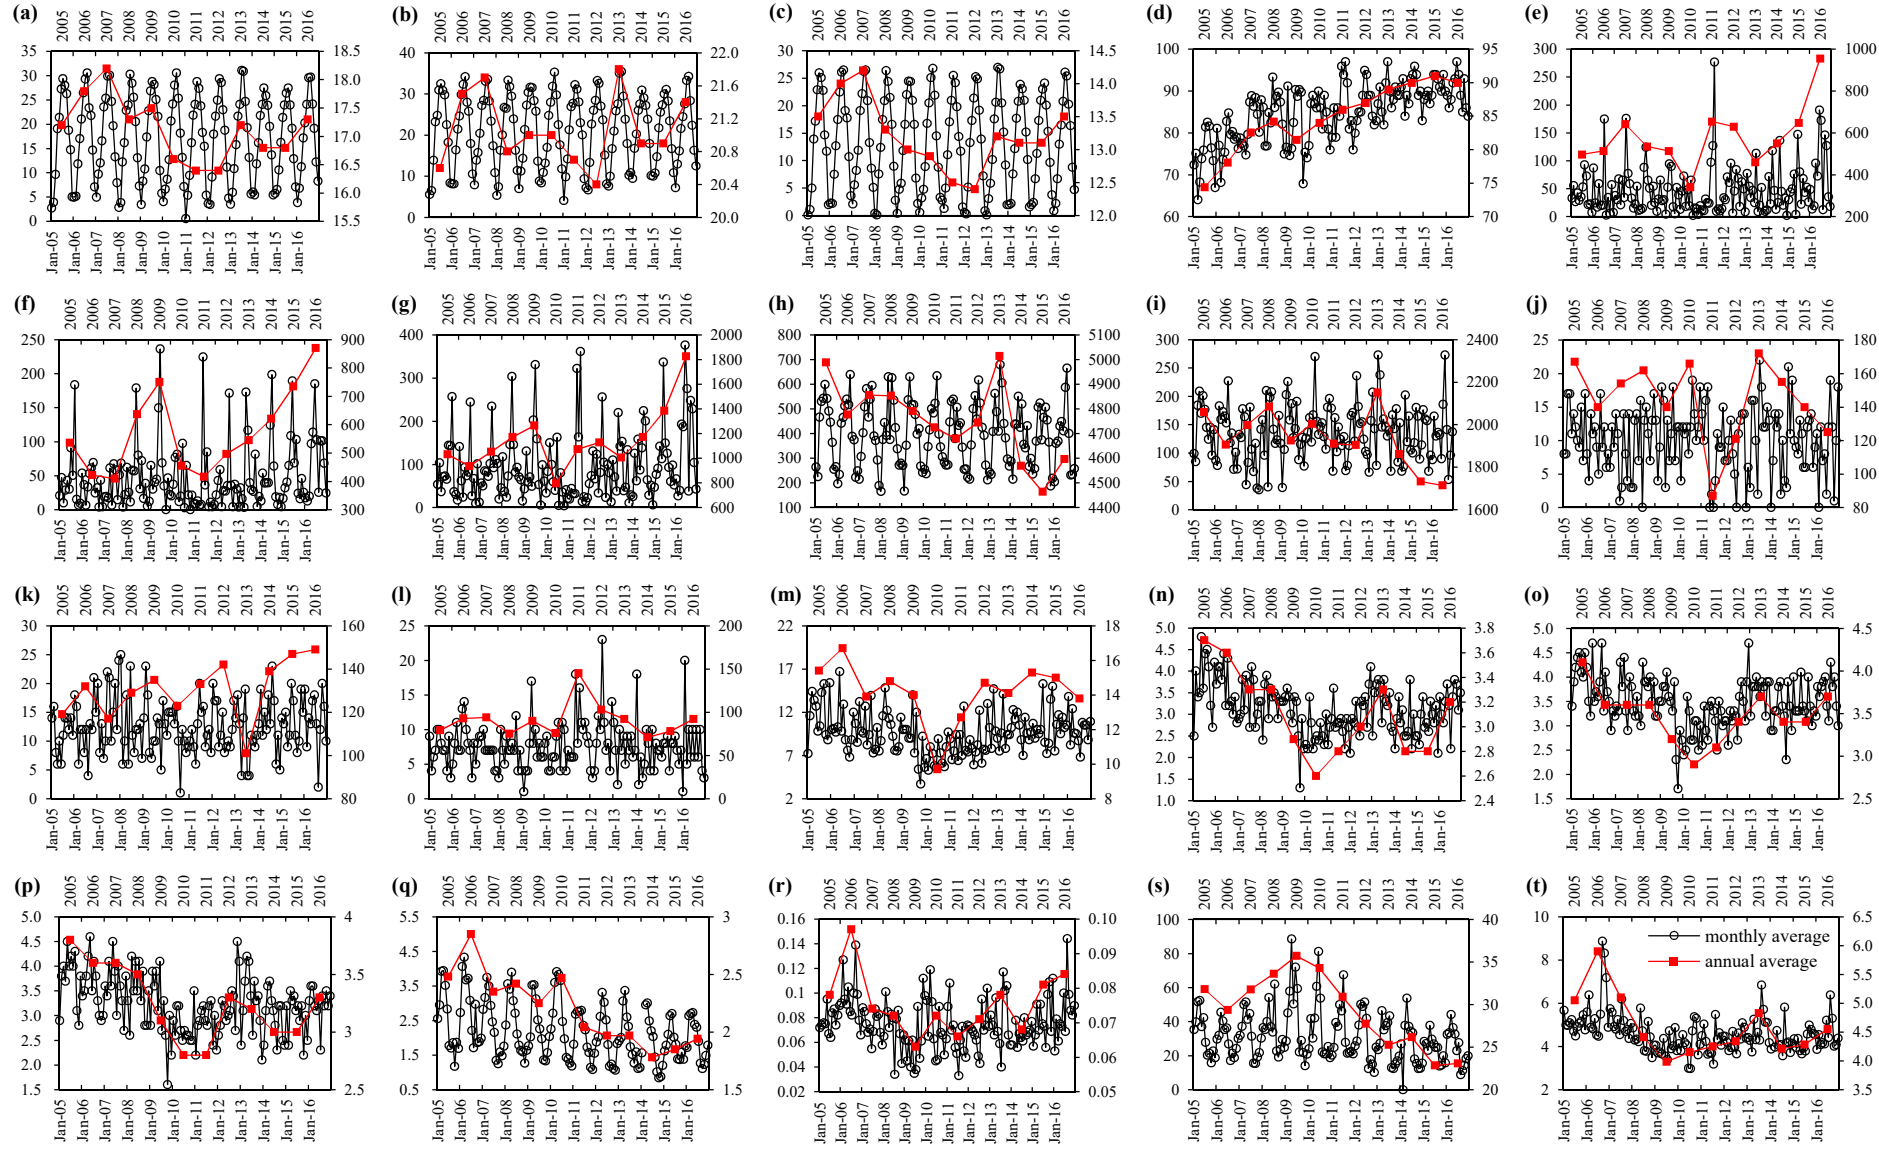

**Figure S1.** Monthly and annual average of environmental factors (including meteorological and water quality factors) in Taihu Lake. (a)–(t) T, T<sub>max</sub>, T<sub>min</sub>, RH, P<sub>20-8</sub>, P<sub>8-20</sub>, P<sub>20-20</sub>, TR, SH, SD<sub>60</sub>, SD<sub>20</sub>, SD<sub>20-60</sub>, WS<sub>max</sub>, WS<sub>8</sub>, WS<sub>14</sub>, WS<sub>20</sub>, TN, TP, TN/TP, and COD<sub>Mn</sub>, respectively. Black circles and red squares are monthly and annual averages of each environmental factors, respectively. Principle x-axis, secondary x-axis, principle y-axis, and secondary y-axis represent month, year, monthly average, and annual average of each environmental factors, respectively. The dimensions of each principle and secondary x-axis are consistent with those provided in Table 4.
